# Supplementary material
Source: bioRxiv or medRxiv preprint supplement (https://www.biorxiv.org/highwire/filestream/39974/field_highwire_adjunct_files/3/135715-4.pdf)
Supplement: Supplementary file [file 135715-4.pdf]

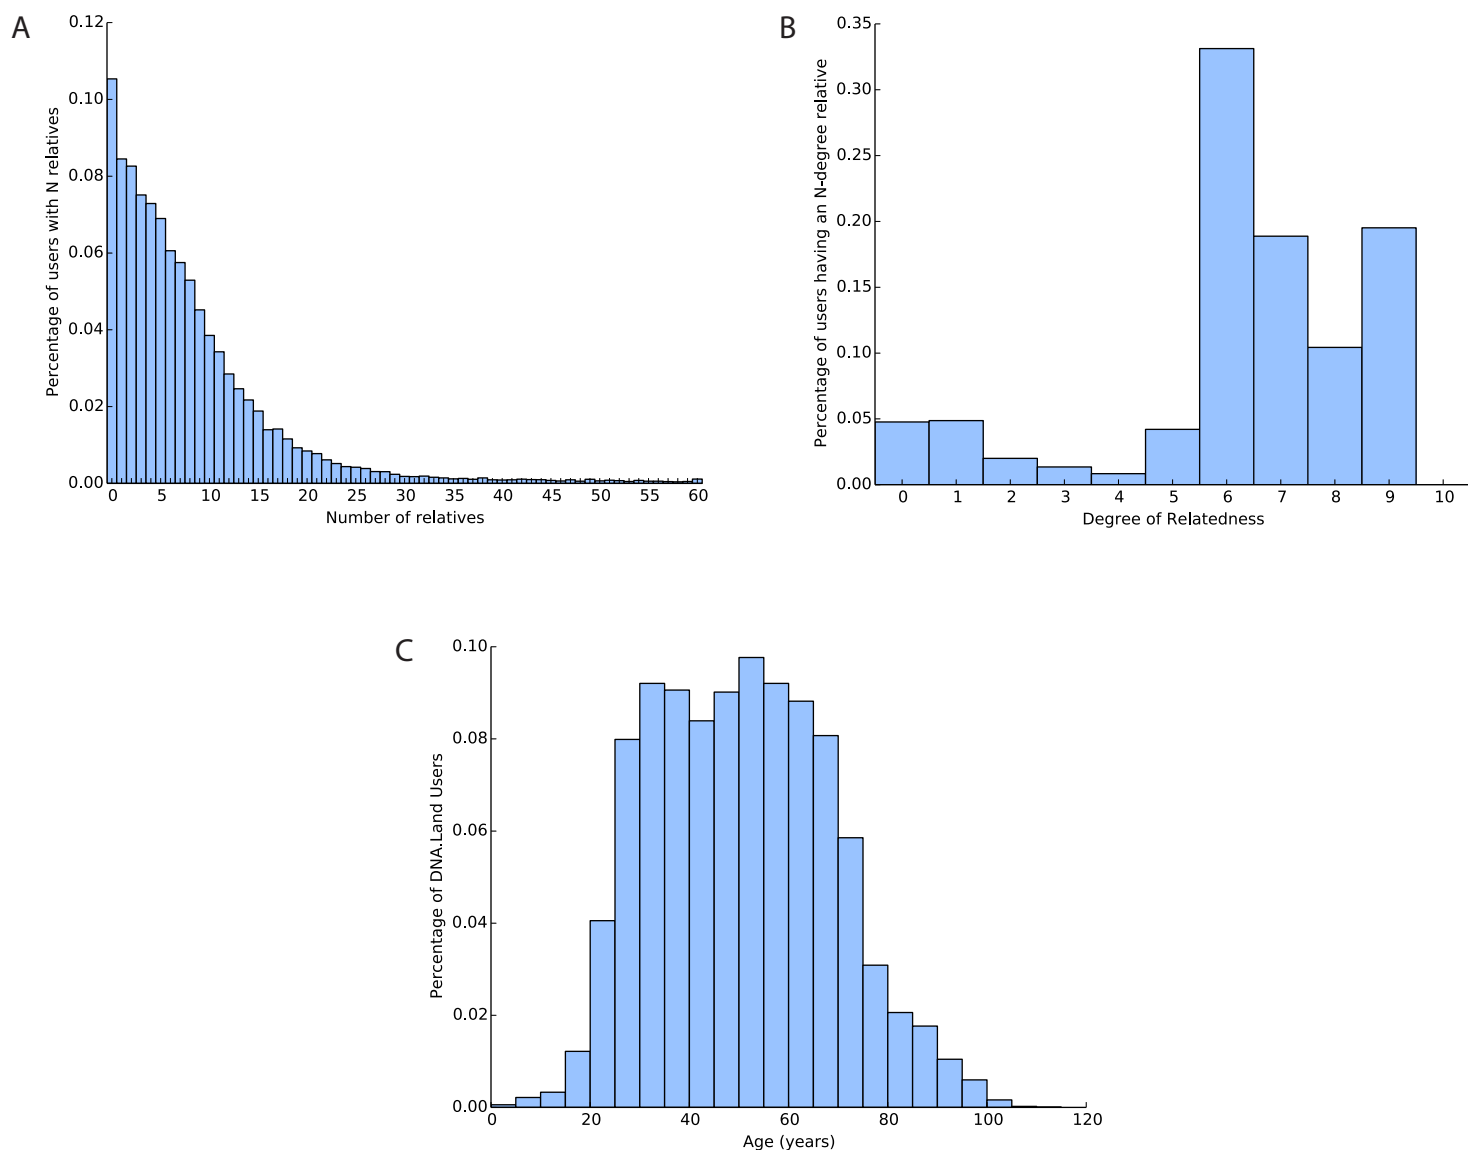

**Supplemental Figure 4:** Relative matching statistics among DNA.Land users. **(A)** The distribution of the number of inferred relatives among DNA.Land users based on matching IBD segments. Only 10.5% of DNA.Land users have no detected relatives. **(B)** The distribution of degrees of relatedness among matching pairs of DNA.Land users, as calculated by the ERS algorithm. A degree of 0 indicates either an identical twin or duplicate genotype file. **(C)** The distribution of self-reported ages of DNA.Land users.
